# Supplementary material
Source: ML conference proceedings conference paper supplement (https://openaccess.thecvf.com/content/WACV2025/html/Wang_STAY_Diffusion_Styled_WACV_2025_paper.html)
Supplement: Supplementary file 1 [file Wang_STAY_Diffusion_Styled_WACV_2025_supplemental.pdf]

## A. Implementation and Evaluation Details

### A.1. Design of STAY Diffusion’s Network Blocks

We illustrate the design of the Layout Diffusion Resblock and the Diffusion StyledMaskAttnBlock in Fig. 8. In the Layout Diffusion Resblock (see Fig. 8(a)), we replace the Group Normalization [48] layers with novel Edge-Aware Normalization (EA Norm) layers, and the updated object masks  $M^{j+1}$  are predicted at the end of the block. Before passing to the next block, we follow the design in [41] to further refine  $M_i^{j+1}$  with  $M_i^{j+1} = (1 - \eta) \cdot M_i^0 + \eta \cdot M_i^{j+1}$ , where  $\eta$  is a learnable weight and  $i, j$  are the object and ResBlock indices, respectively. Note that the  $M^j$  used for the current Resblock is the weighted sum of the initial object masks  $M^0$  and the predicted masks  $M^j$  from the previous Resblock. As for the Diffusion StyledMaskAttnBlock, we replace the original self-attention by the proposed Styled-Mask Attention (SM Attention) layer as shown in Fig. 8(b).

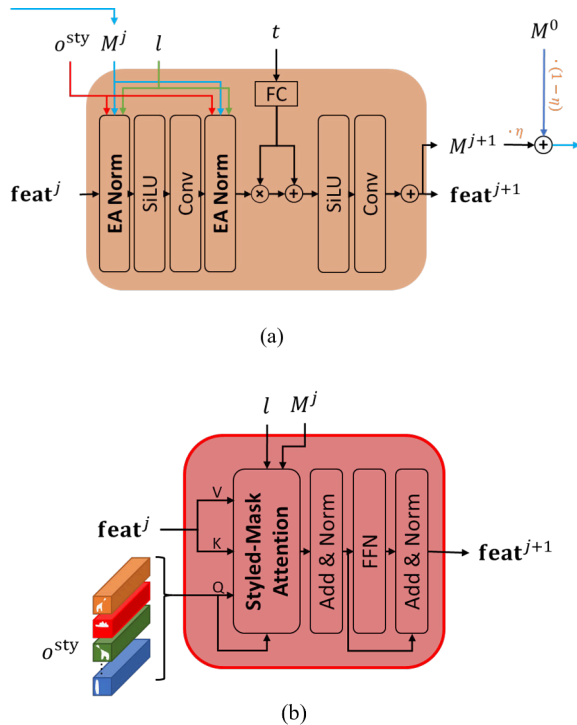

Figure 8. The design of (a) the Layout Diffusion Resblock and (b) the Diffusion StyledMaskAttnBlock, respectively.

### A.2. Evaluation Images of Compared Methods

For layout-to-image (L2I) synthesis methods, we acquired images of LostGAN v2 [41], PLGAN [44], LAMA [21], TwFA [50], LayoutDiffuse [6], and LayoutDiffusion (LayoutDM) [56] by sampling from the checkpoints released by the authors. Since there is no publicly available

Table 4. The reported FID and YoloScore (AP) in Tab. 2 of GLIGEN [20] and our reproduced results (marked with \*).

| Methods      | FID ↓ | Yolo ↑ |
|--------------|-------|--------|
| GLIGEN [20]  | 21.04 | 22.4   |
| GLIGEN [20]* | 21.30 | 23.0   |

COCO-stuff checkpoint for GLIGEN [20], we followed the setting described by the authors to train a model on COCO-stuff based on LDM [34]. We then sampled from this model, following the instructions of the authors such as using scheduled sampling. Our evaluation results on the sampled images (cf. Tab. 1 and Tab. 6) closely matched the reported numbers in GLIGEN (cf. Tab. 2<sup>1</sup> in their main paper). We also provide a quick comparison in Tab. 4. As for Visual Genome (VG), we sampled from the checkpoint provided by the authors of GLIGEN.

For semantic image synthesis benchmark methods, we selected ControlNet-v1.1 [52], FreestyleNet [49], PITI [45] and SDM [46] for evaluation. We used the checkpoints released by the authors and gave the models different sets of semantic maps (i.e., the ground truth map (GT), the self-supervised map with overlapping objects from Tab. 2(a) (Base) and the self-supervised map from our full model (Ours)) to generate images for evaluation.

### A.3. Training and Sampling Details for STAY Diffusion

We reported the used hyperparameters of STAY Diffusion for training and sampling in Tab. 5. For models trained at resolution  $256 \times 256$ , we used four Tesla A100 for training. For models trained at resolution  $128 \times 128$ , we used four Tesla V100 for training. Finally, a Tesla V100 was used to sample images from both resolutions.

## B. Interactivity of STAY Diffusion

We demonstrate the interactivity of STAY Diffusion in Fig. 9. Although imperfect, the self-supervised maps generated by STAY Diffusion can help reduce human effort for image labeling or provide more comprehensive information for downstream tasks such as image blending. As shown in Fig. 9(a), the mask extracted from STAY Diffusion is more accurately aligned with the object shape than the one drawn from a raw bounding box. Furthermore, in Fig. 9(b), we gradually added an object to the layout to demonstrate that STAY Diffusion can be easily adjusted to reconfigurations.

<sup>1</sup>The authors of GLIGEN refer to COCO-stuff as COCO2017D.

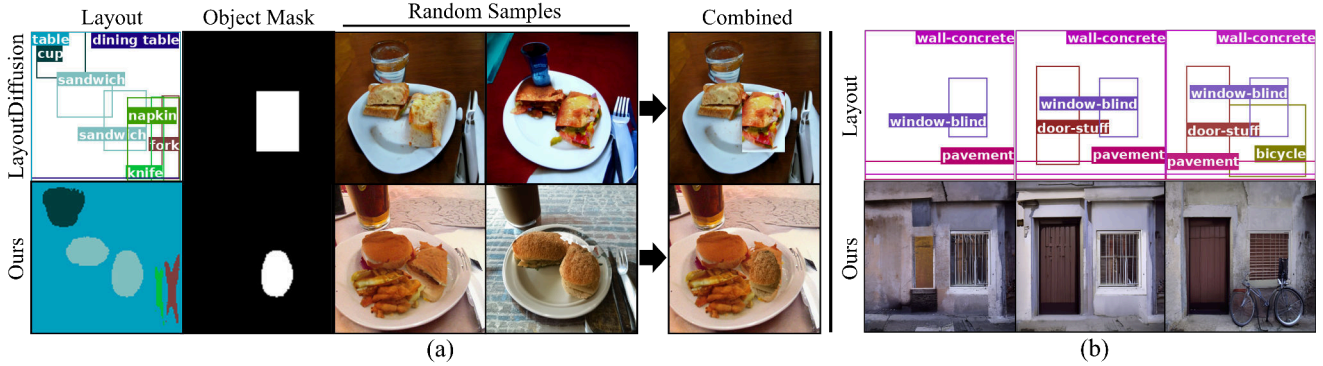

Figure 9. The interactivity of STAY Diffusion. (a) With the self-supervised semantic maps, STAY Diffusion provides more accurate object location for tasks like image blending. (b) STAY Diffusion can adapt to reconfigured layouts.

## C. Additional Results

### C.1. Full Quantitative Results

We reported the full quantitative results on COCO-stuff in Tab. 6 and Visual Genome (VG) in Tab. 7. Note that the YOLOScores are only applicable for COCO-stuff as defined in [21]. As shown in both tables, our STAY Diffusion presents superior performance in image diversity, generation accuracy, and controllability. As for image quality, our method shows comparable results to the previous state-of-the-art (SOTA) in FID and IS.

### C.2. More Visualization Results

We show more visual comparison to previous methods on COCO-stuff in Fig. 10 and Fig. 11, and VG in Fig. 12 and Fig. 13. Additionally, we provided more demonstration of style variations on object appearance in Fig. 14, the learned self-supervised semantic maps and generated images based on the same layout in Fig. 15, and more visual comparisons between our ablated models in Fig. 16.

### C.3. Additional Results for Mask Clarity

We present the full table of the quantitative results on mask clarity in Tab. 8. As for the visual comparison, we present the generated images from different semantic image synthesis and our STAY Diffusion in Fig. 17. It can be clearly seen that the self-supervised maps from our full model (**Ours**) produce images with recognizable objects and higher quality compared to the self-supervised maps from the **Base** (i.e., Tab. 2(a)). This again highlights the importance of the mask clarity. Moreover, it is evident that the semantic image synthesis methods highly rely on precisely labeled maps. When those are not available, their generation quality drops severely. This observation is also aligned with the quantitative results in Tab. 8. On the other hand, our STAY Diffusion still produces images with superior quality in this case due to the proposed EA Norm and SM Attention in Sec. 3.

Table 5. The used hyperparameters for the proposed STAY Diffusion in Sec. 4 experiments.

| <b>Dataset</b>                            | <b>COCO-stuff 256×256</b> | <b>COCO-stuff 128×128</b> | <b>VG 256×256</b>     |
|-------------------------------------------|---------------------------|---------------------------|-----------------------|
| <b>Model</b>                              | <b>STAY Diffusion</b>     | <b>STAY Diffusion</b>     | <b>STAY Diffusion</b> |
| <b>Layout-Conditional Diffusion Model</b> |                           |                           |                       |
| In Channels                               | 3                         | 3                         | 3                     |
| Hidden Channels                           | 256                       | 128                       | 256                   |
| Channel Multiply                          | 1,1,2,2,4,4               | 1,1,2,3,4                 | 1,1,2,2,4,4           |
| Number of Residual Blocks                 | 2                         | 2                         | 2                     |
| Dropout                                   | 0                         | 0                         | 0                     |
| Diffusion Steps                           | 1000                      | 1000                      | 1000                  |
| Noise Schedule                            | linear                    | linear                    | linear                |
| $\lambda$                                 | 0.001                     | 0.001                     | 0.001                 |
| <b>Object Representation</b>              |                           |                           |                       |
| Class Embedding Dimension                 | 180                       | 180                       | 180                   |
| Style Embedding Dimension                 | 128                       | 128                       | 128                   |
| Maximum Number of Objects                 | 8                         | 8                         | 8                     |
| Maximum Number of Class Id                | 184                       | 184                       | 179                   |
| <b>Edge-Aware Normalization Module</b>    |                           |                           |                       |
| $\alpha$                                  | 0.5                       | 0.5                       | 0.5                   |
| <b>Styled-Mask Attention Module</b>       |                           |                           |                       |
| Attention Method                          | Styled-Mask               | Styled-Mask               | Styled-Mask           |
| Number of Head Channels                   | 64                        | 64                        | 64                    |
| <b>Training Hyperparameters</b>           |                           |                           |                       |
| Total Batch Size                          | 32                        | 32                        | 32                    |
| Number of GPUs                            | 4                         | 4                         | 4                     |
| Learning Rate                             | 1e-4                      | 1e-4                      | 1e-4                  |
| Mixed Precision Training                  | No                        | No                        | No                    |
| Weight Decay                              | 0                         | 0                         | 0                     |
| EMA Rate                                  | 0.9999                    | 0.9999                    | 0.9999                |
| Iterations                                | 1.25M                     | 600K                      | 1.45M                 |
| <b>Sampling Hyperparameters</b>           |                           |                           |                       |
| Total Batch Size                          | 4                         | 8                         | 4                     |
| Number of GPUs                            | 1                         | 1                         | 1                     |
| Classifier-free Guidance $s$              | 1.5                       | 1.5                       | 1.0                   |
| Use DPM-Solver                            | True                      | True                      | True                  |
| DPM-Solver Algorithm                      | dpmsolver++               | dpmsolver++               | dpmsolver++           |
| DPM-Solver Type                           | dpmsolver                 | dpmsolver                 | dpmsolver             |
| DPM-Solver Skip Type                      | time_uniform              | time_uniform              | time_uniform          |
| DPM-Solver Step Method                    | singlestep                | singlestep                | singlestep            |
| DPM-Solver ODE Order                      | 3                         | 3                         | 2                     |
| DPM-Solver Timesteps                      | 50                        | 50                        | 50                    |

Table 6. Quantitative results on COCO-stuff at resolution  $256 \times 256$ . The proposed STAY Diffusion outperforms LayoutDiffusion (LayoutDM) in diversity, accuracy and controllability metrics while maintaining close quality performance.

| Methods           | Coco-Stuff   |                   |                  |              |             |
|-------------------|--------------|-------------------|------------------|--------------|-------------|
|                   | FID ↓        | IS ↑              | DS ↑             | CAS ↑        | Yolo ↑      |
| LostGAN v2 [41]   | 33.17        | 18.08±0.46        | 0.55±0.10        | 33.17        | 15.0        |
| PLGAN [44]        | 30.67        | 18.92±0.65        | 0.52±0.10        | 29.15        | 13.6        |
| LAMA [21]         | 33.00        | 19.77±0.66        | 0.48±0.12        | 9.97         | 20.4        |
| TwFA [50]         | 23.78        | 23.02±0.94        | 0.43±0.13        | 20.09        | 23.9        |
| LayoutDiffuse [6] | 22.41        | 27.09±0.07        | 0.58±0.11        | 31.80        | 23.7        |
| GLIGEN [20]       | 21.30        | <b>27.71±0.79</b> | 0.57±0.09        | 34.41        | 23.0        |
| LayoutDM [56]     | <b>15.74</b> | 26.01±0.84        | 0.58±0.09        | 35.69        | 27.2        |
| <b>Ours</b>       | 17.43        | 26.08±0.76        | <b>0.59±0.09</b> | <b>37.18</b> | <b>29.5</b> |

Table 7. Quantitative results on Visual Genome (VG) at resolution  $256 \times 256$ . The proposed STAY Diffusion outperforms LayoutDiffusion (LayoutDM) in diversity, accuracy and controllability metrics while maintaining close quality performance.

| Methods           | VG           |                   |                  |              |
|-------------------|--------------|-------------------|------------------|--------------|
|                   | FID ↓        | IS ↑              | DS ↑             | CAS ↑        |
| LostGAN v2 [41]   | 34.92        | 14.01±0.81        | 0.53±0.01        | 24.40        |
| PLGAN [44]        | -            | -                 | -                | -            |
| LAMA [21]         | 38.51        | 13.70±0.76        | 0.54±0.10        | 24.16        |
| TwFA [50]         | 18.57        | 17.75±0.68        | 0.50±0.10        | 18.30        |
| LayoutDiffuse [6] | 22.45        | <b>22.89±1.69</b> | 0.56±0.10        | 25.05        |
| GLIGEN [20]       | 23.42        | 21.84±1.38        | 0.60±0.09        | 25.49        |
| LayoutDM [56]     | <b>15.26</b> | 21.94±1.28        | 0.61±0.10        | 26.84        |
| <b>Ours</b>       | 18.02        | 18.56±0.91        | <b>0.65±0.08</b> | <b>27.23</b> |

Table 8. Quantitative results of mask clarity on COCO-stuff. When GT maps are absent, the images generated from the self-supervised maps of our full model (**Ours**) outperform other baseline methods in quality and controllability metrics, highlighting the importance of clear masks.

| Methods              | Mask | FID ↓        | IS ↑              | DS ↑             | CAS ↑        | Yolo ↑      |
|----------------------|------|--------------|-------------------|------------------|--------------|-------------|
| ControlNet-v1.1 [52] | GT   | 32.24        | 24.80±1.44        | 0.54±0.08        | 22.43        | 25.6        |
| FreestyleNet [49]    | GT   | 14.80        | 30.06±0.92        | 0.50±0.09        | 36.67        | 42.9        |
| PITI [45]            | GT   | 15.22        | 28.08±1.11        | 0.45±0.12        | 37.20        | 34.8        |
| SDM [46]             | GT   | 20.79        | 23.82±0.53        | 0.65±0.18        | 36.42        | 26.9        |
| ControlNet-v1.1 [52] | Base | 64.29        | 17.47±0.49        | 0.59±0.09        | 9.36         | 4.1         |
| FreestyleNet [49]    | Base | 37.21        | 20.40±0.73        | 0.50±0.09        | 21.54        | 12.9        |
| PITI [45]            | Base | 61.01        | 12.90±0.39        | 0.46±0.12        | 14.02        | 4.7         |
| SDM [46]             | Base | 40.08        | 15.41±0.26        | 0.69±0.18        | 19.29        | 10.5        |
| ControlNet-v1.1 [52] | Ours | 50.25        | 20.65±0.93        | 0.60±0.09        | 15.38        | 6.5         |
| FreestyleNet [49]    | Ours | 32.95        | 22.59±0.66        | 0.56±0.10        | 26.52        | 13.8        |
| PITI [45]            | Ours | 37.41        | 17.24±0.91        | 0.53±0.13        | 18.63        | 12.0        |
| SDM [46]             | Ours | 35.53        | 17.70±0.72        | <b>0.69±0.19</b> | 22.69        | 13.5        |
| <b>Ours</b>          | Ours | <b>17.43</b> | <b>26.08±0.76</b> | 0.59±0.09        | <b>37.18</b> | <b>29.5</b> |

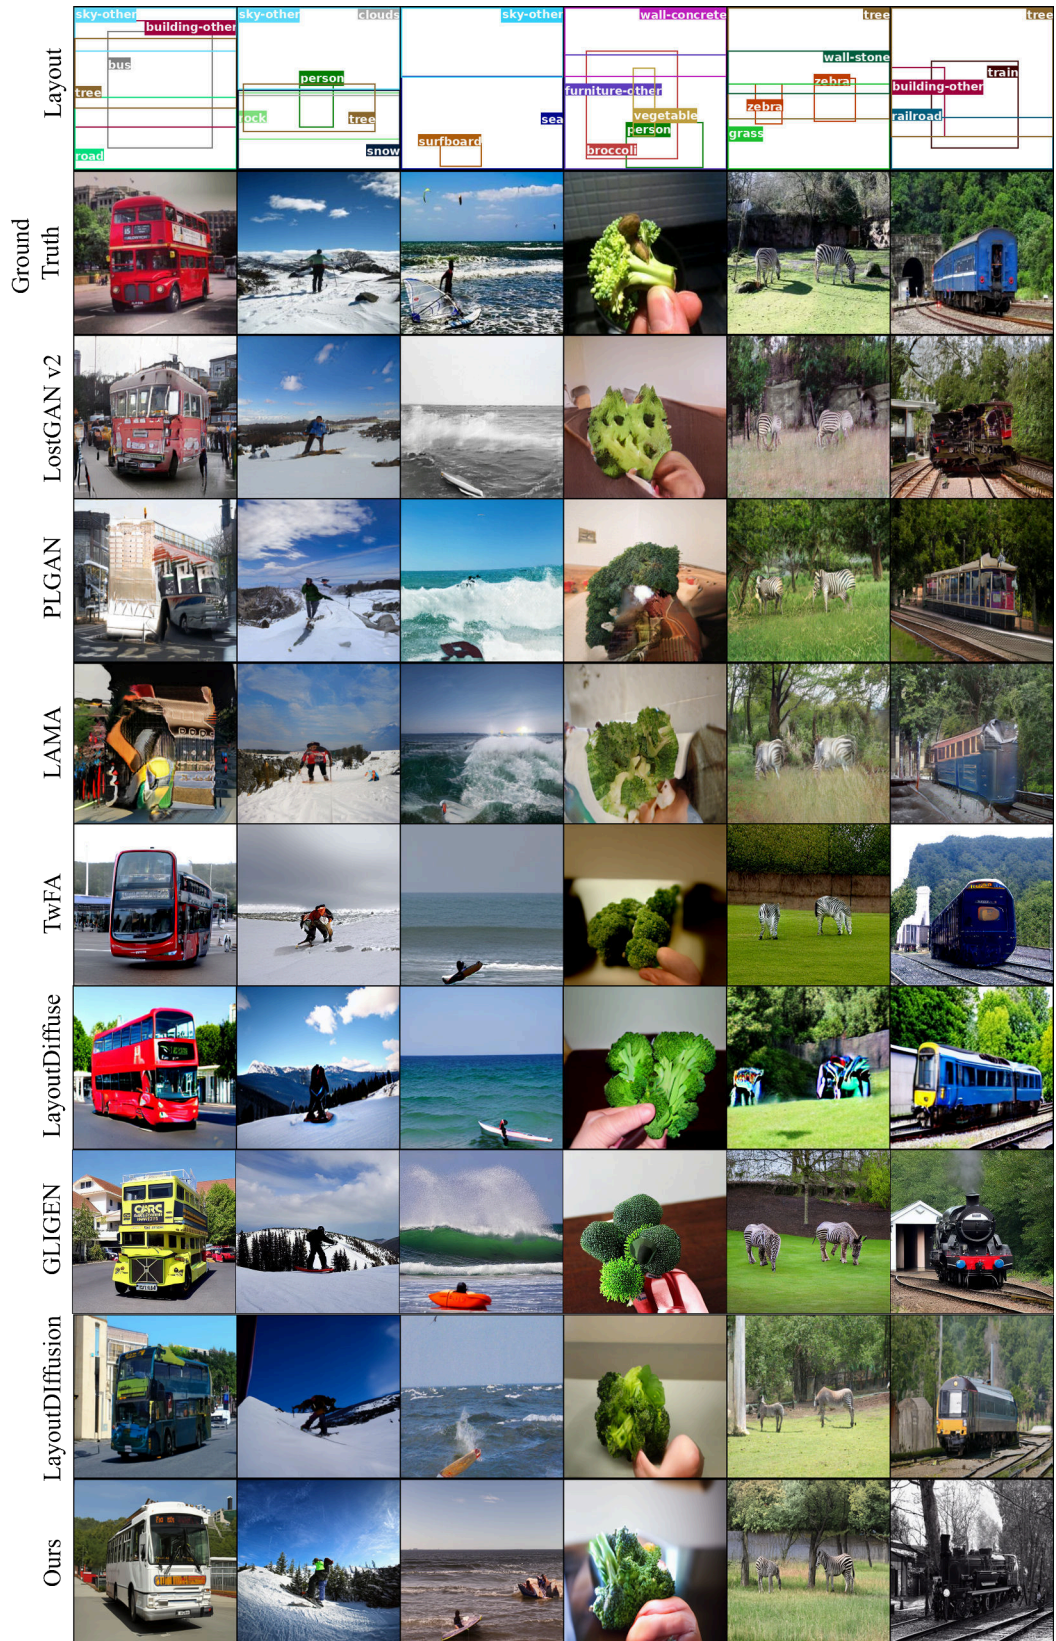

Figure 10. More comparison with previous methods on COCO-stuff  $256 \times 256$ . Zoom in for better view.

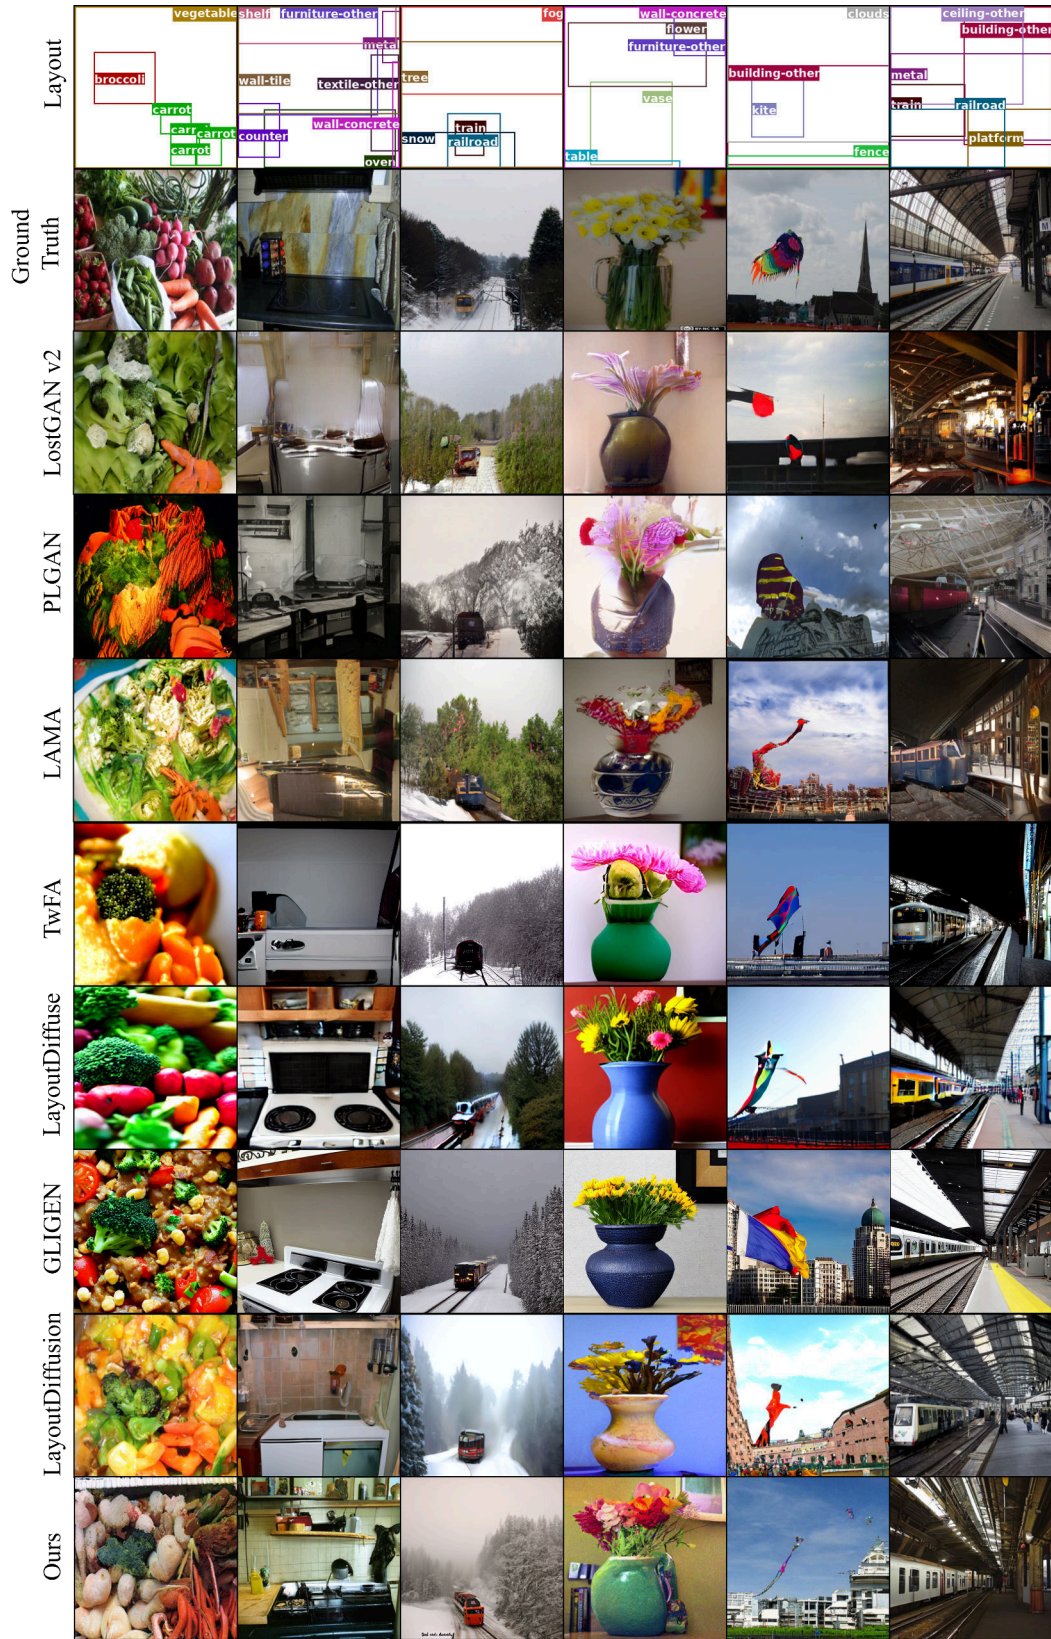

Figure 11. More comparison with previous methods on COCO-stuff  $256 \times 256$ . Zoom in for better view.

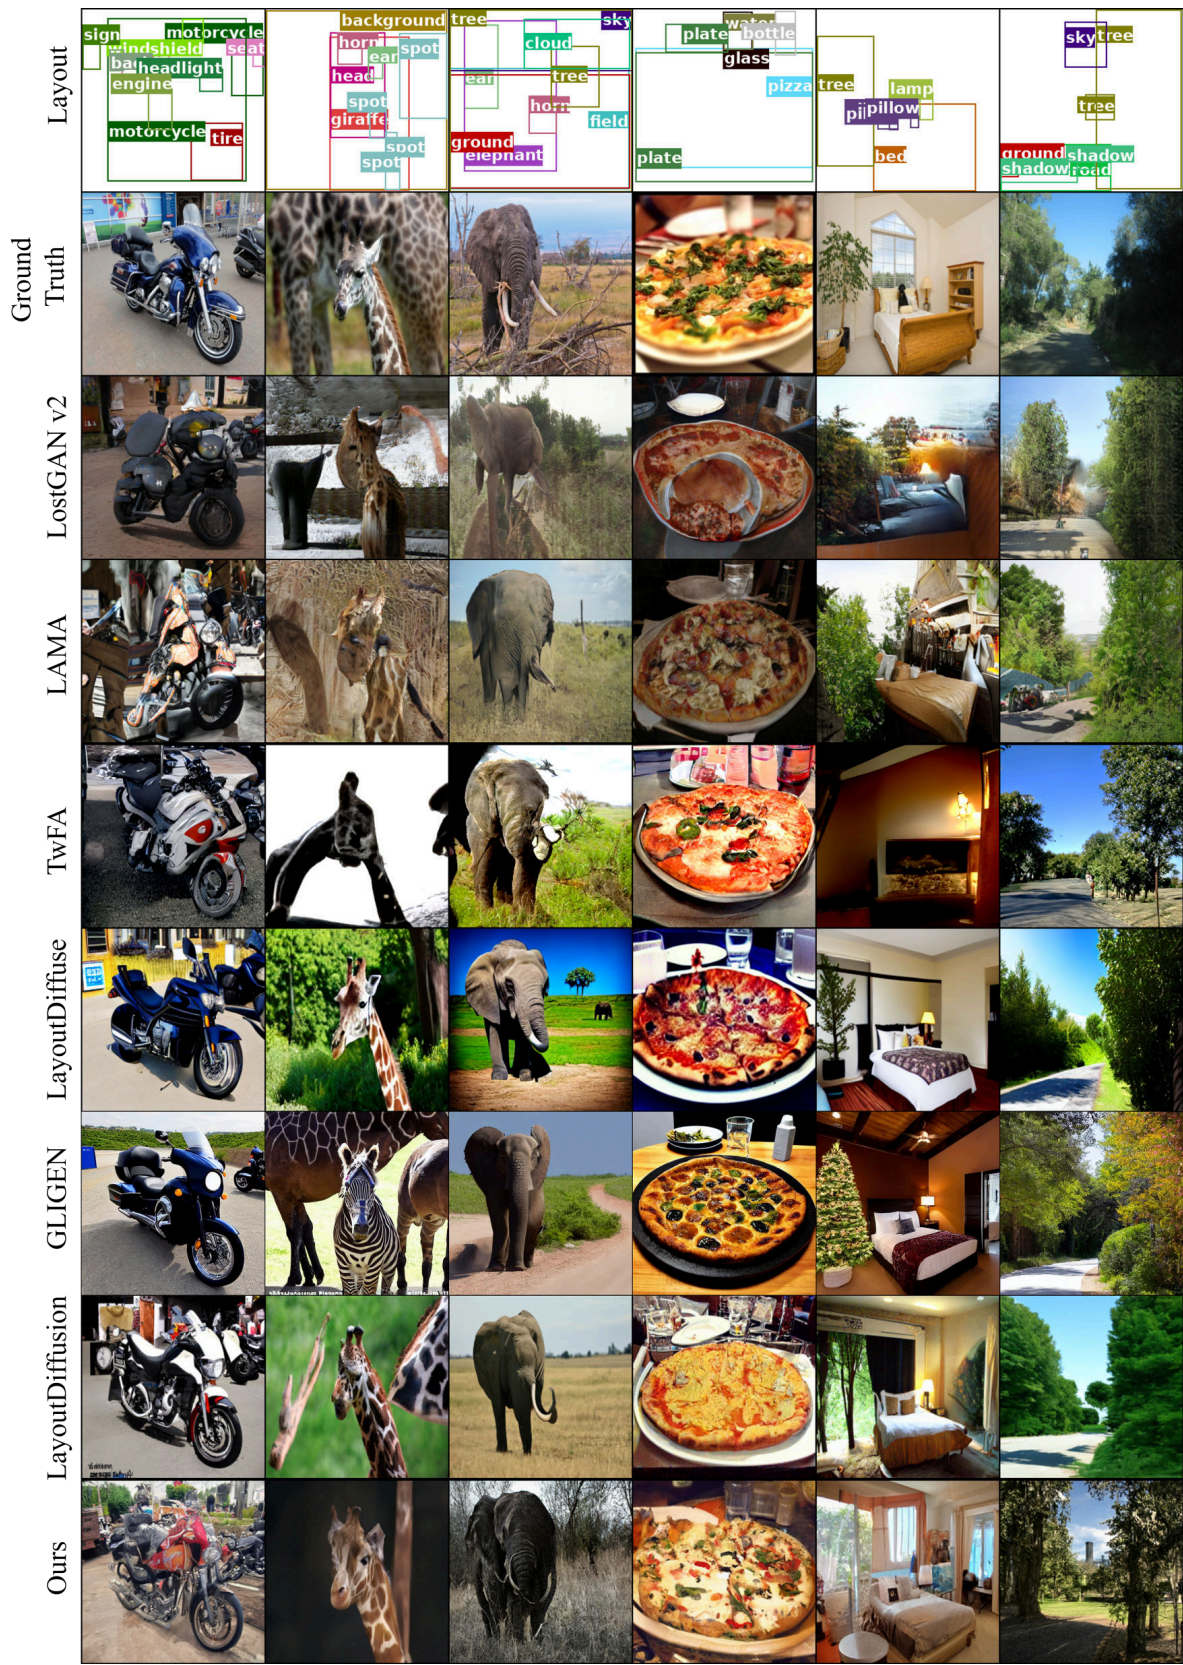

Figure 12. Visual comparison with previous methods on VG  $256 \times 256$ .

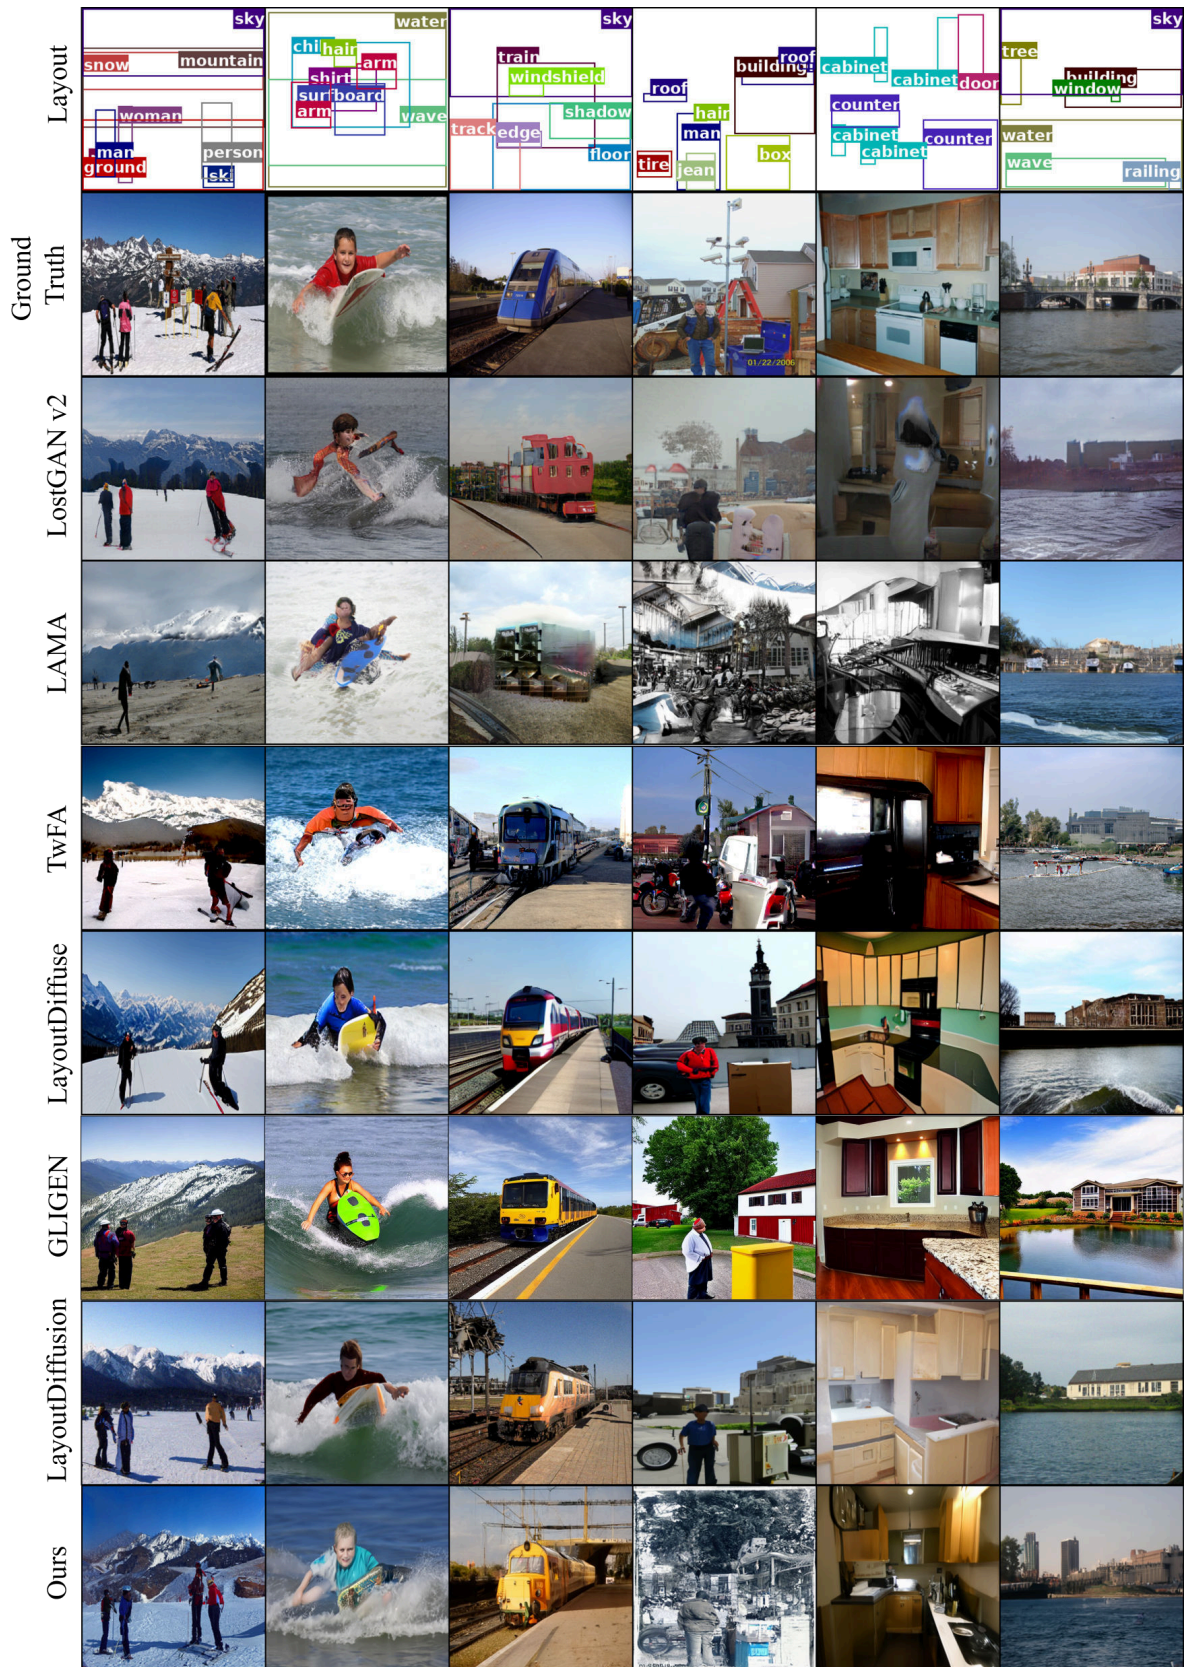

Figure 13. Visual comparison with previous methods on VG  $256 \times 256$ .



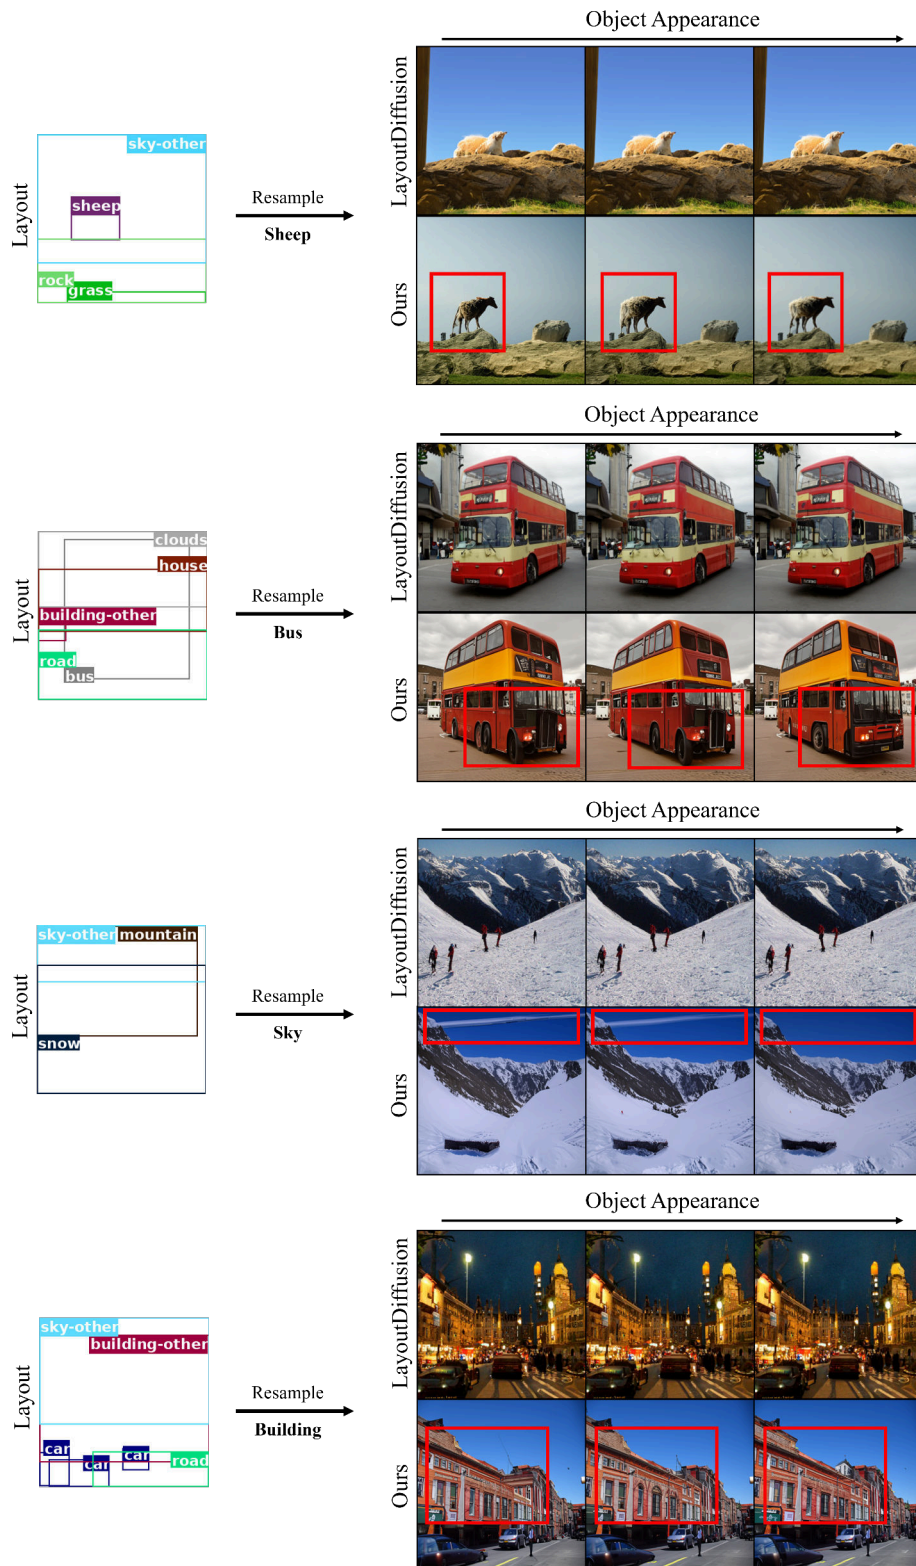

Figure 14. The demonstration of fine-grained style variations offered by our STAY Diffusion. Note that only one object is resampled in each image (Zoom in for better view).

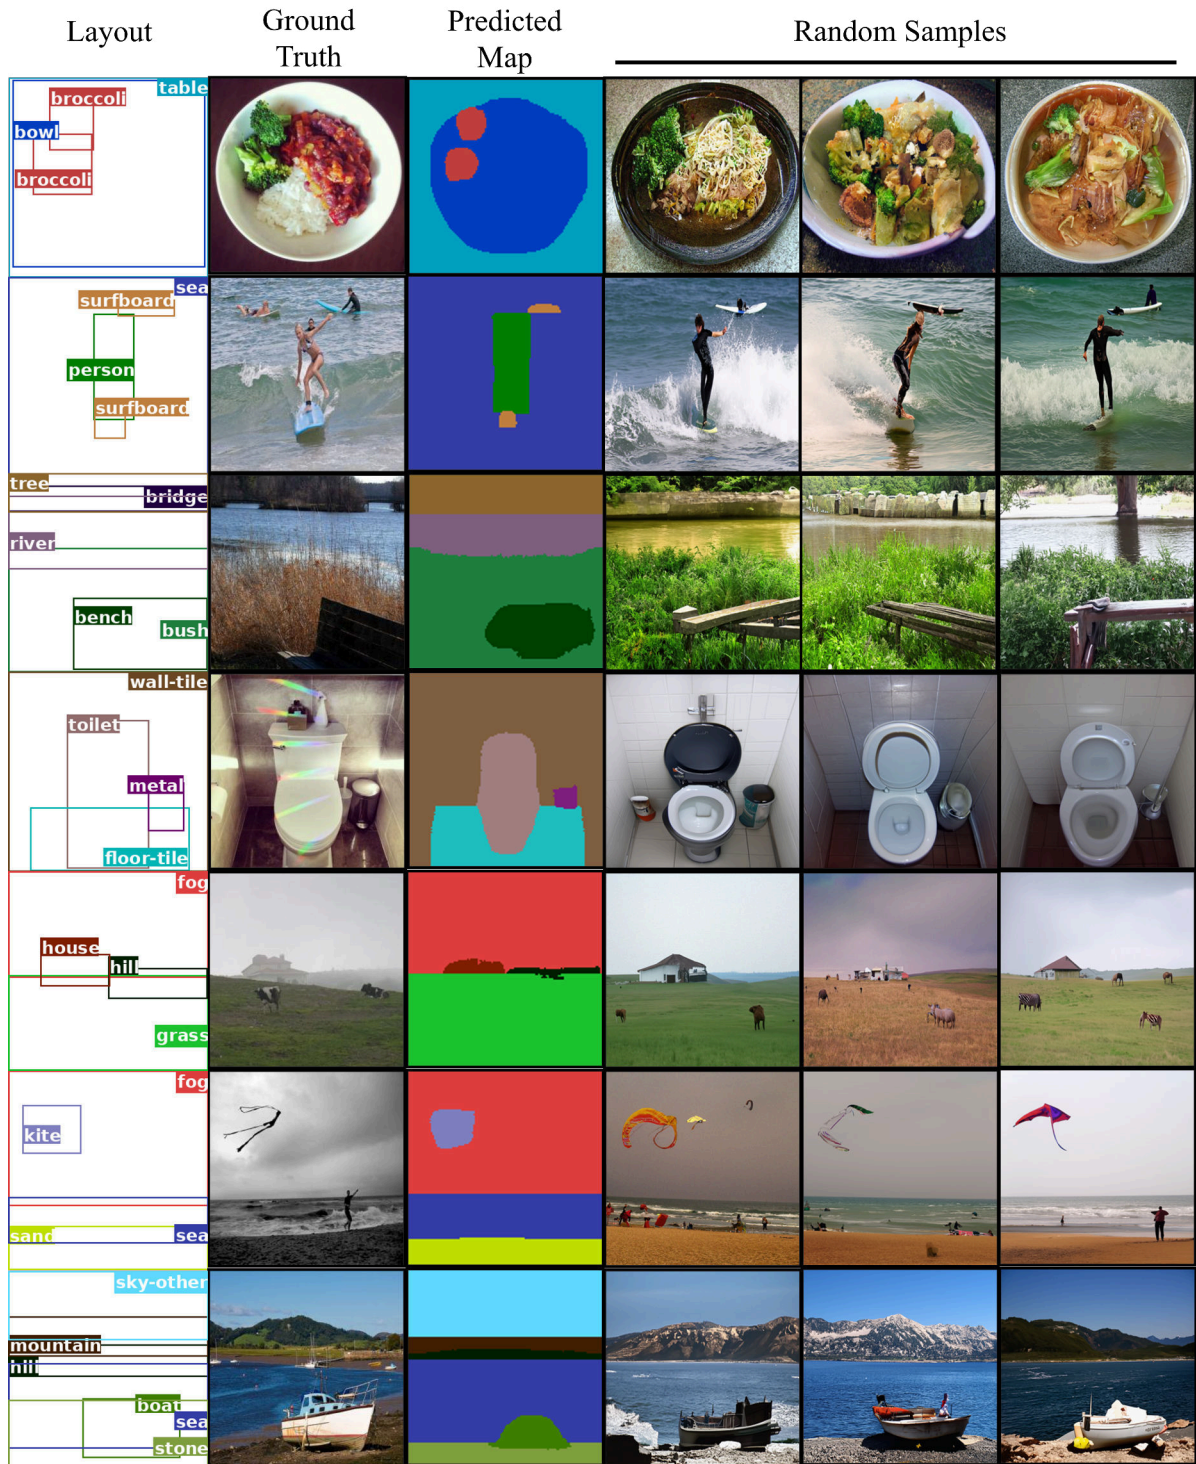

Figure 15. The demonstration of self-supervised semantic maps learned by our STAY Diffusion.

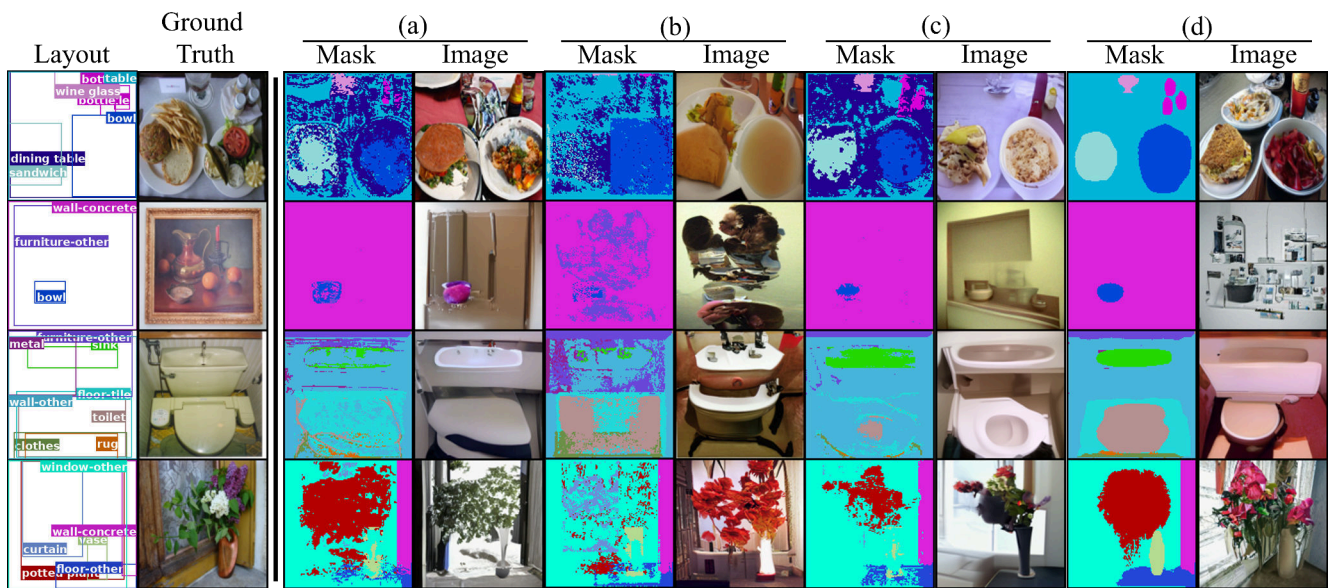

Figure 16. The generated images and their predicted self-supervised semantic maps from ablated models mentioned in Sec. 4.5. (a) ISLA Norm + Self Attention. (b) EA Norm + Self Attention. (c) ISLA Norm + SM Attention. (d) EA Norm + SM Attention.

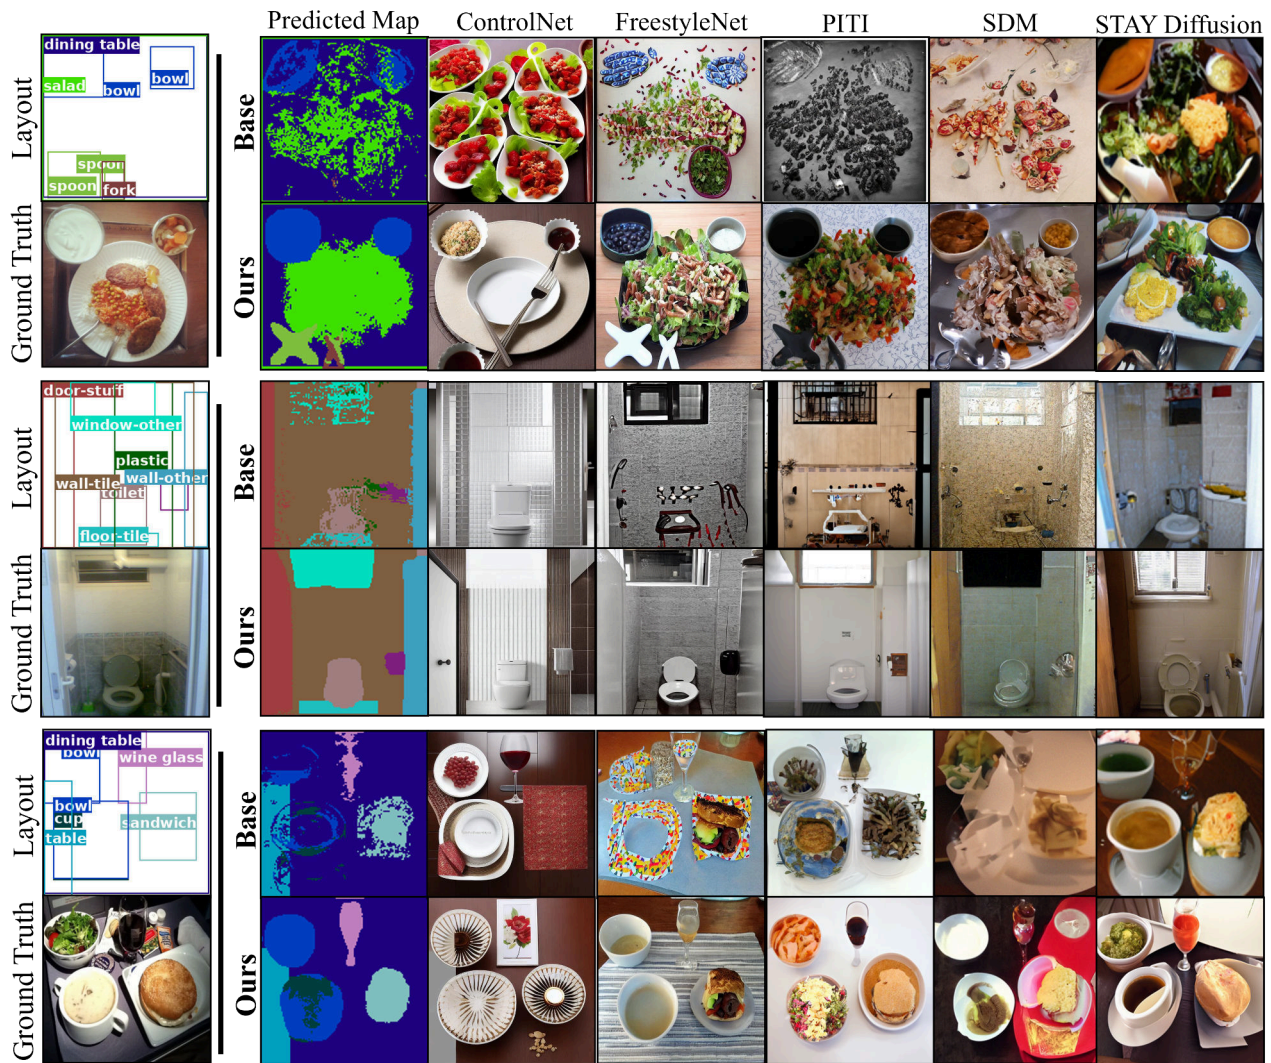

Figure 17. The visual comparison of images generated from different semantic image synthesis methods and our STAY Diffusion. Note that **Base** indicates the baseline self-supervised map from Tab. 2 setting (a) and **Ours** indicates the self-supervised map from the full model (i.e., Tab. 2 setting (d)).
